# Supplementary material for: Automated classification of tertiary lymphoid structures in colorectal cancer using TLS-PAT artificial intelligence tool
Source: Springer Nature journal article supplement (doi:10.1038/s41598-025-94664-0), 2025-03-21
Supplement: MOESM1 [file 41598_2025_94664_MOESM1_ESM.pdf]

**Supplementary Data 1: Table of the results of the Cohen's Kappa test for interrater agreement assessment for TLS maturation evaluation.**

|                    | Cohen's Kappa [95% C.I.]      | Level of inter-rater agreement |
|--------------------|-------------------------------|--------------------------------|
| Rater 1 vs Rater 2 | 0,80057<br>[0,66265 ;0,93849] | Strong                         |
| Rater 2 vs Rater 3 | 0,85896<br>[0,74115 ;0,97676] | Strong                         |
| Rater 1 vs Rater 3 | 0,88522<br>[0,77609 ;0,99435] | Strong                         |
